# Supplementary material
Source: Springer Nature journal article supplement (https://www.springermedizin.de/resource/supplementary/12967_2012_1363_MOESM2_ESM.pdf/9573458)

37 °C

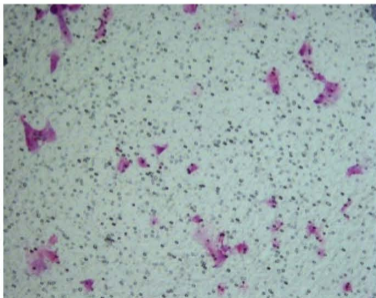

42 °C

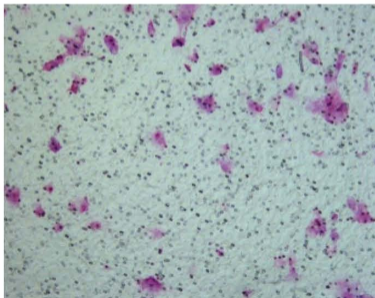

47 °C

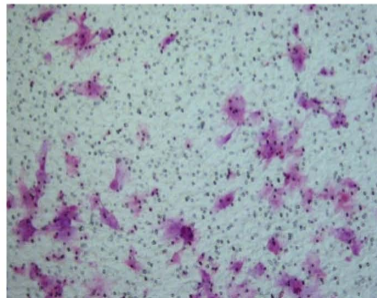

Supplement: MOESM2 [file 9573458]
